# Supplementary material
Source: MDPI journal article supplement (https://www.mdpi.com/1424-8247/16/10/1471)
Supplement: s1 [file s1]

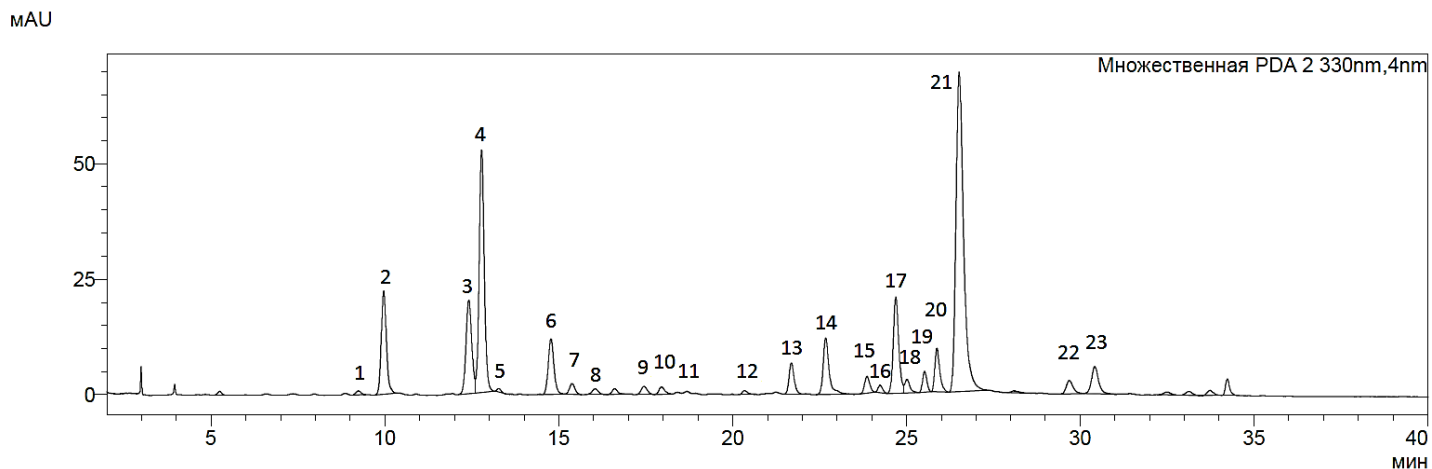

Figure S1. HPLC chromatogram of polyphenolic compounds of chicory extract (330 nm).

Table S1. Phenolic compounds identified in CE.

| Compound                       | Compound number<br>(see fig 1S) | Retention time, min | Molecular weight, Da | Positive ionization, m/z, fragments                                                                                   | Negative ionization, m/z, fragments                                                               |
|--------------------------------|---------------------------------|---------------------|----------------------|-----------------------------------------------------------------------------------------------------------------------|---------------------------------------------------------------------------------------------------|
| Dihydroxybenzoic acid          | 1                               | 9.241               | 154                  | 172 [M+H <sub>2</sub> O] <sup>-</sup>                                                                                 | 153 [M-H] <sup>-</sup>                                                                            |
| Cichoriin                      | 2                               | 9.969               | 340                  | 179 (esculetin)<br>341 [M+H] <sup>-</sup><br>363 [M+Na] <sup>-</sup><br>681 2M+H<br>703 [2M+Na] <sup>-</sup>          | 177 (esculetin)<br>339 [M-H] <sup>-</sup><br>679 [2M-H] <sup>-</sup>                              |
| Caftaric acid                  | 3                               | 12.414              | 312                  | 313 [M+H] <sup>-</sup><br>330 [M+H <sub>2</sub> O] <sup>-</sup><br>335 [M+Na] <sup>-</sup>                            | 149 (tartaric acid)<br>179 (caffeic acid)<br>311 [M-H] <sup>-</sup><br>357 [M+HCOOH] <sup>-</sup> |
| Chlorogenic acid               | 4                               | 12.783              | 354                  | 163 caffeic acid – H <sub>2</sub> O)<br>355 [M+H] <sup>-</sup><br>377 [M+Na] <sup>-</sup><br>731 [2M+Na] <sup>-</sup> | 191 (quinic acid)<br>353 [M-H] <sup>-</sup><br>707 [2M-H] <sup>-</sup>                            |
| <i>n</i> - hydroxybenzoic acid | 5                               | 13.270              | 138                  | 139 [M+H] <sup>-</sup>                                                                                                | 137 [M-H] <sup>-</sup>                                                                            |

|                                          |    |        |     |                                                                                                                                                 |                                                     |
|------------------------------------------|----|--------|-----|-------------------------------------------------------------------------------------------------------------------------------------------------|-----------------------------------------------------|
| Esculetin                                | 6  | 14.778 | 178 | 179 [M+H] <sup>-</sup><br>201 [M+Na] <sup>-</sup><br>379<br>[2M+Na] <sup>-</sup>                                                                | 177 [M-H] <sup>-</sup><br>355 [2M-H] <sup>-</sup>   |
| Caffeic acid                             | 7  | 15.383 | 180 | 163 [M-H <sub>2</sub> O] <sup>-</sup><br>181 [M+H] <sup>-</sup><br>198<br>[M+H <sub>2</sub> O] <sup>-</sup>                                     | 179 [M-H] <sup>-</sup>                              |
| Coumaroylquinic acid                     | 8  | 16.612 | 338 | 147 (quinic acid)<br>339<br>361 [M+Na] <sup>-</sup><br>699 [2M+H] <sup>-</sup>                                                                  | 191 (quinic acid)<br>337<br>675 [2M-H] <sup>-</sup> |
| Coutaric acid<br>(coumaroyltartaric)     | 9  | 17.49  | 296 | 147 (coumaric acid)<br>297 [M+H] <sup>-</sup><br>314<br>[M+H <sub>2</sub> O] <sup>-</sup><br>319<br>[2M+Na] <sup>-</sup>                        | 295 [M-H] <sup>-</sup>                              |
| Feruloylquinic acid                      | 10 | 17.955 | 368 | 177 (ferulic acid - H <sub>2</sub> O)<br>195 (ferulic acid)<br>369 [M+H] <sup>-</sup><br>391 [M+Na] <sup>-</sup><br>759<br>[2M+Na] <sup>-</sup> | 367 [M-H] <sup>-</sup><br>735 [2M-H] <sup>-</sup>   |
| Fertaric acid<br>(Feruloyltartaric acid) | 11 | 18.561 | 326 | 195 (ferulic acid)<br>327 [M+H] <sup>-</sup><br>344<br>[M+H <sub>2</sub> O] <sup>-</sup><br>349 [M+Na] <sup>-</sup>                             | 325 [M-H] <sup>-</sup>                              |
| Rutin                                    | 12 | 20.344 | 610 | 303 (quercetin)<br>611 [M+H] <sup>-</sup><br>633 [M+Na] <sup>-</sup>                                                                            | 609 [M-H] <sup>-</sup>                              |
| Isoquercetin                             | 13 | 21.693 | 464 | 303 (quercetin)<br>465 [M+H] <sup>-</sup><br>487 [M+Na] <sup>-</sup><br>951<br>[2M+Na] <sup>-</sup>                                             | 463 [M-H] <sup>-</sup><br>927 [2M-H] <sup>-</sup>   |

|                                         |    |        |     |                                                                                                                                                                                             |                                                                                                                                                 |
|-----------------------------------------|----|--------|-----|---------------------------------------------------------------------------------------------------------------------------------------------------------------------------------------------|-------------------------------------------------------------------------------------------------------------------------------------------------|
| Quercetin glucuronide                   | 14 | 22.680 | 478 | 303<br>479 [M+H] <sup>-</sup><br>501 [M+Na] <sup>-</sup>                                                                                                                                    | 477 [M-H] <sup>-</sup><br>955 [2M-H] <sup>-</sup>                                                                                               |
| Isochlorogenic acid B (dicofeoylquinic) | 15 | 23.868 | 516 | 499 [M-H <sub>2</sub> O] <sup>-</sup><br>517                                                                                                                                                | 515<br>561 [M+Na] <sup>-</sup>                                                                                                                  |
| Astragalin                              | 16 | 24.244 | 448 | 287 (kaempferol)<br>449 [M+H] <sup>-</sup><br>471 [M+Na] <sup>-</sup><br>919<br>[2M+Na] <sup>-</sup>                                                                                        | 447 [M-H] <sup>-</sup><br>895 [2M-H] <sup>-</sup>                                                                                               |
| Isochlorogenic acid A (dicofeoylquinic) | 17 | 24.697 | 516 | 163 (caffeic acid H <sub>2</sub> O)<br>181 (caffeic acid)<br>499 [M-H <sub>2</sub> O] <sup>-</sup><br>517<br>539 [M+Na] <sup>-</sup>                                                        | 353 (caffeine-quinine acid)<br>515<br>561 [M+Na] <sup>-</sup>                                                                                   |
| Kaempferol/ luteolin glucuronide        | 18 | 25.018 | 462 | 287 (aglycone)<br>463 [M+H] <sup>-</sup><br>485 [M+Na] <sup>-</sup>                                                                                                                         | 461 [M-H] <sup>-</sup><br>923 [2M-H] <sup>-</sup>                                                                                               |
| Isorhamnetin glucuronide                | 19 | 25.524 | 492 | 317 (isoramnetin)<br>493 [M+H] <sup>-</sup><br>515 [M+Na] <sup>-</sup>                                                                                                                      | 491 [M-H] <sup>-</sup>                                                                                                                          |
| Isochlorogenic acid C (dicofeoylquinic) | 20 | 25.878 | 516 | 163 (caffeic acid - H <sub>2</sub> O)<br>181 (caffeic acid)<br>499 [M-H <sub>2</sub> O] <sup>-</sup><br>517<br>539 [M+Na] <sup>-</sup>                                                      | 515                                                                                                                                             |
| Chicoric acid                           | 21 | 26.519 | 474 | 163 (caffeic acid - H <sub>2</sub> O)<br>181 (caffeic acid)<br>475 [M+H] <sup>-</sup><br>492<br>[M+H <sub>2</sub> O] <sup>-</sup><br>497 [M+Na] <sup>-</sup><br>971<br>[2M+Na] <sup>-</sup> | 293 [M- caffeic acid -H <sub>2</sub> O] <sup>-</sup><br>311 [M- caffeic acid] <sup>-</sup><br>473 [M-H] <sup>-</sup><br>947 [2M-H] <sup>-</sup> |

|                                 |    |        |     |                                                                                                                                                                                    |                                    |
|---------------------------------|----|--------|-----|------------------------------------------------------------------------------------------------------------------------------------------------------------------------------------|------------------------------------|
| Luteolin                        | 22 | 29.690 | 286 | 287 [M+H] <sup>-</sup><br>309 [M+Na] <sup>-</sup>                                                                                                                                  | 285 [M-H] <sup>-</sup>             |
| Coumaroyl-feruloyltartaric acid | 23 | 30.416 | 488 | 177<br>(феруловая кислота - H <sub>2</sub> O)<br>195 (ferulic acid a)<br>327 (feruloyltartaric acid)<br>489<br>506<br>[M+H <sub>2</sub> O] <sup>-</sup><br>511 [M+Na] <sup>-</sup> | 325 (feruloyltartaric acid)<br>487 |
